# Supplementary material for: Synthesis and characterization of side-bound aryldiazo and end-bound nitrosyl complexes of nickel
Source: Royal Society of Chemistry journal article supplement (doi:10.1039/b510131j), 2005-01-01
Supplement: b510131j.pdf [file b510131j.pdf]

## Supplemental Material for:

# Synthesis and Characterization of Side-Bound Aryldiazo and End-Bound Nitrosyl Complexes of Nickel

Vlad M. Iluc, Alexander J. M. Miller and Gregory L. Hillhouse\*

## Experimental Details

**General Considerations.** Unless otherwise stated, all reactions were carried out under an inert atmosphere, using either an MBraun *Lab Master* glove box with purified dinitrogen atmosphere, or Schlenk techniques under an argon atmosphere. Anhydrous diethyl ether was purchased from Fischer, stirred over sodium metal, and filtered through activated alumina. Hexanes, petroleum ether, and toluene were dried by passage through activated alumina and Q-5 columns. C<sub>6</sub>D<sub>6</sub> and CD<sub>2</sub>Cl<sub>2</sub> were purchased from Cambridge Isotope Laboratories, degassed by freeze-pump-thaw cycles, and dried over CaH<sub>2</sub> or activated 4 Å molecular sieves. Celite, alumina, and 4 Å molecular sieves were activated by evacuation overnight at 180°C. [(dtbpe)Ni]C<sub>6</sub>H<sub>6</sub> (**1**)<sup>1</sup> and [(dtbpe)NiCl]<sub>2</sub> (**3**)<sup>2</sup> were prepared by the literature methods. All other chemicals were used as received. Infrared data (CaF<sub>2</sub> plates and Fluorolube S-20 mull) were measured using a Nicolet 670-FT-IR instrument. Elemental analyses were performed by Desert Analytics (Tucson, AZ). <sup>1</sup>H, <sup>13</sup>C, <sup>19</sup>F, and <sup>31</sup>P NMR spectra were recorded on Bruker 400 or 500 MHz spectrometers. <sup>1</sup>H and <sup>13</sup>C NMR resonances are reported with reference to solvent resonances: residual C<sub>6</sub>D<sub>5</sub>H in C<sub>6</sub>D<sub>6</sub>, at δ<sub>H</sub> = 7.16 and δ<sub>C</sub> = 128.0; residual CDHCl<sub>2</sub> in CD<sub>2</sub>Cl<sub>2</sub> at δ<sub>H</sub> = 5.32 and δ<sub>C</sub> = 53.8. <sup>31</sup>P NMR spectra are reported with reference to an external 85% H<sub>3</sub>PO<sub>4</sub> solution, with δ<sub>P</sub> = 0; residual C<sub>4</sub>H<sub>7</sub>DO in THF-*d*<sub>8</sub> at δ<sub>H</sub> = 3.58 and δ<sub>C</sub> = 67.57. X-Ray diffraction data were collected on a Siemens Platform goniometer with a Charged

Coupled Device (CCD) detector. Structures were solved by direct methods using the SHELXTL (version 5.1) program suite (G. Sheldrick, Bruker Analytical X-Ray Systems, Madison, WI).

**Preparation of [(dtbpe)Ni(N<sub>2</sub>C<sub>6</sub>H<sub>4</sub>OCH<sub>3</sub>)] [PF<sub>6</sub>] (2).** To a solution of **1** (100 mg, 0.12 mmol) in 10 mL of Et<sub>2</sub>O cooled to -35°C was added a 5 mL Et<sub>2</sub>O solution of [N<sub>2</sub>C<sub>6</sub>H<sub>4</sub>OCH<sub>3</sub>] [PF<sub>6</sub>] (68 mg, 0.24 mmol). The reaction mixture was stirred for 1 h at room temperature. After removing of solvent under vacuum the residue was triturated with n-pentane (3x5 mL) and the product was recrystallized from a 1:1 THF:n-pentane mixture yielding pure red crystalline **2** (138 mg, 83%). For **2**: <sup>1</sup>H-NMR (298K, 400.1 MHz, THF-*d*<sub>8</sub>): δ 8.00 (d, 2H, J<sub>HH</sub> = 9 Hz, Ar), 7.27 (d, 2H, J<sub>HH</sub> = 9 Hz, Ar), 3.94 (s, 3H, OCH<sub>3</sub>), 3.62 (m, 2H, CH<sub>2</sub>CH<sub>2</sub>O), 2.22 (m, 4H, CH<sub>2</sub>P), 1.78 (m, 2H, CH<sub>2</sub>CH<sub>2</sub>O), 1.48 (d, 18H, J<sub>HP</sub> = 13 Hz, C(CH<sub>3</sub>)<sub>3</sub>), 1.44 (d, 18H, J<sub>HP</sub> = 13 Hz, C(CH<sub>3</sub>)<sub>3</sub>). <sup>13</sup>C{<sup>1</sup>H} NMR (298K, 100.62 MHz, THF-*d*<sub>8</sub>): δ 165.64 (s, Ar), 130.59 (s, Ar), 126.38 (s, Ar), 116.77 (s, Ar), 68.21 (s, CH<sub>2</sub>CH<sub>2</sub>O), 56.67 (s, OCH<sub>3</sub>), 36.63 (d, J<sub>CP</sub> = 18Hz, C(CH<sub>3</sub>)<sub>3</sub>), 35.15 (d, J<sub>CP</sub> = 18Hz, C(CH<sub>3</sub>)<sub>3</sub>), 30.75 (d, J<sub>CP</sub> = 4Hz, C(CH<sub>3</sub>)<sub>3</sub>), 30.36 (d, J<sub>CP</sub> = 4Hz, C(CH<sub>3</sub>)<sub>3</sub>), 26.37 (s, CH<sub>2</sub>CH<sub>2</sub>O), 23.53 (dd, J<sub>CP</sub> = 24Hz, J<sub>CP</sub> = 9Hz, CH<sub>2</sub>P), 22.78 (dd, J<sub>CP</sub> = 24Hz, J<sub>CP</sub> = 9Hz, CH<sub>2</sub>P). <sup>31</sup>P{<sup>1</sup>H} NMR (298K, 162MHz, THF-*d*<sub>8</sub>): δ 94.68 (d, J<sub>PP</sub> = 25 Hz), 93.75 (d, J<sub>PP</sub>=25 Hz), -143.74 (sept., J<sub>PF</sub> = 710 Hz). IR (Fluorolube mull, CaF<sub>2</sub>): 1602 (s, ν<sub>N=N</sub>), 1481 cm<sup>-1</sup>. Anal. Calcd. for **2**•**0.5 THF**, C<sub>27</sub>H<sub>51</sub>F<sub>6</sub>N<sub>2</sub>NiO<sub>1.5</sub>P<sub>3</sub>: C, 46.77; H, 7.41; N, 4.04 %. Found: C, 46.59; H, 7.26; N, 3.50 %.

**Preparation of (dtbpe)Ni(OTf) (4).** 0.205 g (0.249 mmol) [(dtbpe)NiCl]<sub>2</sub> (**3**) was dissolved in 8 mL THF, and the light-orange solution was cooled to -35°C. A 5 mL cold clear solution of 0.175 g (0.248 mmol) TlOTf was added to the solution of **3**, and the

resultant mixture immediately turns cloudy orange. After 1.5 h, the cloudy tan solution was filtered, leaving white  $\text{TiCl}_3$  solid. The filtered clear brown solution is dried and extracted with 6 mL toluene, again leaving white solid. The clear brown toluene solution is cooled to  $-35^\circ\text{C}$  and left in the freezer overnight, yielding 0.081 g (0.154 mmol, 76%) paramagnetic (1.98  $\mu\text{B}$ ) **4**.  $^1\text{H}$  NMR ( $22^\circ\text{C}$ , 400 MHz,  $\text{C}_6\text{D}_6$ ):  $\delta$  10.5 (br,  $\Delta\nu_{1/2} = 752$  Hz),  $\delta$  -11.5 (br,  $\Delta\nu_{1/2} = 476$  Hz). Anal. Calcd. for  $\text{C}_{19}\text{H}_{40}\text{F}_3\text{NiO}_3\text{P}_2\text{S}$ : C, 43.37; H, 7.66 %. Found: C, 42.89; H, 7.19 %.

**Preparation of (dtbpe)Ni(NO)(OTf) (5).** In a 100 mL Schlenk flask (dtbpe)NiOTf (**4**; 0.092 g, 0.174 mmol) was dissolved in 15 mL toluene. The golden brown toluene solution was cooled to  $-78^\circ\text{C}$ . Added 0.174 mmol NO gas via syringe to the cooled solution, which causes a fast color change to blue-green. The reaction was stirred at  $-78^\circ\text{C}$  for 15 min, and became a bright blue color. The reaction mixture was then warmed to room temperature while stirring for 45 minutes. The Schlenk flask was evacuated and the solution was concentrated under reduced pressure to 2 mL, with blue precipitate. The Schlenk flask was cycled into the glove box, where an additional 3 mL toluene was used to dissolve the blue precipitate. The 5 mL blue solution was filtered, and cooled to  $-35^\circ\text{C}$  and left in the freezer overnight. Blue crystals of **7** formed, in a crop of 0.085 g (0.154 mmol, 86%).  $^1\text{H}$  NMR ( $22^\circ\text{C}$ , 400 MHz,  $\text{CD}_2\text{Cl}_2$ ):  $\delta$  2.01 (d,  $\text{CH}_2\text{CH}_2$ , 4H), 1.27 (d, tBu, 36H).  $^{31}\text{P}\{^1\text{H}\}$  NMR ( $22^\circ\text{C}$ , 400 MHz,  $\text{CD}_2\text{Cl}_2$ ):  $\delta$  92.5 (s, dtbpe).  $^{13}\text{C}\{^1\text{H}\}$  NMR ( $22^\circ\text{C}$ , 400 MHz,  $\text{CD}_2\text{Cl}_2$ ):  $\delta$  35.7 (m,  $\text{C}-(\text{CH}_3)_3$ ), 29.8 (br,  $\text{CH}_3$ ), 26.4 (m,  $\text{CH}_2\text{CH}_2$ ). IR ( $\text{CaF}_2$ , Fluorolube): 2948, 2309, 1764 ( $\nu_{\text{NO}}$ )  $\text{cm}^{-1}$ . Anal. Calcd. for  $\text{C}_{19}\text{H}_{40}\text{F}_3\text{NNiO}_4\text{P}_2\text{S}$ : C, 41.03; H, 7.25; N, 2.52 %. Found: C, 40.69; H, 7.10; N, 2.24 %.

**Preparation of [(dtbpe)Ni(NO)][BAr<sup>F</sup><sub>4</sub>] (6).** In the dry-box, a scintillation vial was charged with **5** (0.040 g, 0.0726 mmol) dissolved in 5 mL diethyl ether, chilled to -35°C, and added to a cold suspension of NaBAr<sup>F</sup><sub>4</sub> (0.060 g, 0.070 mmol) in diethyl ether. The mixture was stirred for 30 min, and darkened to a blue-green color, with a white precipitate. The reaction mixture was filtered, dried in vacuo, and washed with toluene, affording a jade-green solid. The green product **6** was extracted with chlorobenzene, and crystallized from a chlorobenzene/ petroleum ether solution, giving 0.060 g (91 %) yield. <sup>1</sup>H NMR (22°C, 500 MHz, CD<sub>2</sub>Cl<sub>2</sub>): δ 7.72 (s, 8H, BAr<sup>F</sup><sub>4</sub>), 7.56 (s, 4H, BAr<sup>F</sup><sub>4</sub>), 1.58 (d, 4H, CH<sub>2</sub>Cl<sub>2</sub>), 1.53 (d, 36H, *t*-butyl). <sup>31</sup>P{<sup>1</sup>H} NMR (22°C, 500 MHz, CD<sub>2</sub>Cl<sub>2</sub>): δ 78.7 (s, dtbpe). <sup>13</sup>C{<sup>1</sup>H} NMR (22°C, 400 MHz, CD<sub>2</sub>Cl<sub>2</sub>): δ 162.0 (q, CF<sub>3</sub>), 134.9 (s), 129.1 (d), 126.0 (s), 123.3(s), 117.6 (s), 36.25 (m, C-(CH<sub>3</sub>)<sub>3</sub>), 30.97 (br, CH<sub>3</sub>), 20.2 (m, CH<sub>2</sub>CH<sub>2</sub>). IR (CaF<sub>2</sub>, Fluorolube): 1832 cm<sup>-1</sup> (ν<sub>NO</sub>). Anal. Calcd. for C<sub>50</sub>BH<sub>52</sub>F<sub>24</sub>NNiOP<sub>2</sub>: C, 47.27; H, 4.13; N, 1.10 %. Found: C, 48.02; H, 3.83; N, 1.00 %.

#### References:

- (1) I. Bach, K. -R. Pörschke, R. Goddard, C. Kopsike, C. Krüger, A. Rufinska and K. Seevogel, *Organometallics*, 1996, **15**, 4959.
- (2) D. J. Mindiola, R. Waterman, D. M. Jenkins and G. L. Hillhouse, *Inorg. Chim. Acta*, 2003, **345**, 299.
